# Supplementary material for: Dysregulation of Neuronal Genes by Fetal-Neonatal Iron Deficiency Anemia Is Associated with Altered DNA Methylation in the Rat Hippocampus
Source: Nutrients. 2019 May 27;11(5):1191. doi: 10.3390/nu11051191 (PMC6566599; doi:10.3390/nu11051191)
Supplement: Supplementary file 1 [file nutrients-11-01191-s001.xlsx]

## Sheet: control_vs_FeDef_defiant_c10_Cp
Supplement Table S1: Differentially methylated regions in ID hippocampus. Percentage differences are weighted.
Chr	Start	End	#mCpN	#Diff.CpN	Mean_Difference	control	FeDef	Inside_Genes	Between_Genes	Gene_Promoter_Cutoff_15000_Nucleotides
1	2984116	2984175	5	3	-54.1	[68.2,87.8,94.1]	[35.5,3.5,66.7]	Ust	n/a	Ust
1	3283278	3283785	8	2	26.3	[85.1,70.7,62.0]	[98.1,98.7,95.2]	n/a	Ust-125047,985340-Samd5	n/a
1	3332817	3332836	5	4	49	[47.1,30.0,32.4]	[99.2,79.0,41.3]	n/a	Ust-174586,936289-Samd5	n/a
1	14745012	14745130	5	2	-42.4	[57.2,78.3,52.5]	[30.9,16.9,31.1]	n/a	Olig3-174479,101238-Ifngr1	n/a
1	24003758	24003842	5	4	-52.9	[63.5,97.3,85.9]	[18.9,25.4,62.7]	n/a	Sgk1-494662,275998-Clvs2	n/a
1	41054728	41054799	5	4	-47.1	[54.5,67.1,52.9]	[2.2,23.7,13.7]	Tmem181	n/a	Tmem181
1	41178581	41178648	5	4	51.9	[32.6,27.0,30.8]	[82.5,89.7,69.7]	Ezr	n/a	Ezr
1	53742719	53742971	5	2	50.5	[68.4,31.1,43.8]	[98.7,97.2,82.0]	n/a	Thbs2-129067,129522-LOC100125364	n/a
1	54090073	54090645	5	2	11.8	[73.5,61.0,58.8]	[73.1,74.5,86.3]	n/a	Tcte3-184393,149424-Dll1	n/a
1	55893444	55893557	5	3	48	[34.9,9.8,2.4]	[74.5,34.7,70.9]	n/a	Chd1-1262287,3689-Riok2	Riok2
1	77135564	77135647	10	10	-77.7	[76.6,89.9,88.6]	[33.7,1.0,28.0]	Fkrp	n/a	Fkrp
1	83975016	83975169	7	3	21.5	[65.3,66.6,77.8]	[88.1,92.7,98.1]	n/a	Lgals7-4998,13830-Capn12	Capn12
1	84451057	84451286	10	4	-20.6	[35.2,43.6,23.4]	[5.2,19.9,10.0]	Dpf1	n/a	Dpf1
1	85982567	85982780	10	4	-18.3	[48.6,47.5,41.3]	[24.5,29.5,27.2]	Usf2	n/a	Usf2
1	87122965	87123053	6	3	55.1	[47.7,1.4,4.6]	[53.4,89.9,74.6]	Kctd15	n/a	Kctd15
1	111592052	111592130	5	5	34.7	[29.1,32.2,30.8]	[66.5,66.4,64.3]	Snrpn,Snurf	n/a	Snurf
1	121044743	121044809	6	6	63.2	[0.0,0.0,38.2]	[76.9,92.9,73.7]	n/a	Aldh1a3-162860,56154-Asb7	n/a
1	128654487	128654533	7	6	59.7	[20.8,44.2,4.9]	[82.0,89.1,74.8]	Chd2	n/a	Chd2
1	158953236	158953343	5	3	28.6	[46.6,35.1,42.3]	[62.1,80.0,64.6]	Pde2a	n/a	Pde2a
1	171993800	171993818	8	6	73.6	[1.0,1.0,100.0]	[100.0,55.0,100.0]	Spon1	n/a	Spon1
1	172182951	172183695	5	3	25.1	[38.5,55.6,50.5]	[74.4,81.2,61.6]	n/a	Rras2-85241,15980-Copb1	n/a
1	185363658	185363687	6	4	39.5	[19.1,42.2,39.4]	[61.0,81.6,57.4]	Sbk1	n/a	Sbk1
1	202868640	202869000	7	2	15.9	[47.9,53.6,57.2]	[68.3,68.7,73.4]	n/a	Mir675-44055,37622-Igf2	n/a
1	206461401	206461447	5	2	54.8	[29.5,0.0,19.6]	[64.0,86.3,56.5]	Unc93b1	n/a	Unc93b1
1	208319368	208319451	10	7	12.9	[4.4,2.5,0.4]	[16.2,14.8,14.0]	Map3k11	n/a	Map3k11
1	209815225	209815262	5	3	35.4	[38.0,0.0,10.0]	[45.0,49.0,71.8]	Macrod1	Flrt1-45093,56318-Otub1	Macrod1
1	220326761	220326791	5	3	32.6	[0.8,0.0,0.0]	[27.6,39.1,0.0]	Foxb2	n/a	Foxb2
1	242506849	242506883	6	6	46.1	[48.7,36.0,34.9]	[100.0,91.8,68.2]	Pde6c	n/a	Pde6c
1	252626662	252626754	5	3	-39.4	[38.3,56.3,48.6]	[11.0,4.7,16.9]	Sh3pxd2a	n/a	Sh3pxd2a
1	267364979	267365031	7	5	12.2	[0.0,0.0,0.0]	[13.6,5.2,11.8]	n/a	Cacul1-174483,4477-Eif3a	n/a
10	4888901	4889304	9	6	-33.6	[86.2,83.2,94.6]	[67.2,48.2,53.6]	n/a	Socs1-67874,182731-Dexi	n/a
10	11841326	11841423	5	2	-19.1	[93.8,94.4,92.4]	[75.6,72.0,83.5]	n/a	Dnase1-75817,14144-Cluap1	n/a
10	20351685	20351826	5	4	-41.5	[73.3,73.2,85.2]	[45.2,26.6,60.2]	Slit3	n/a	Slit3
10	21254640	21254742	5	2	42.5	[35.1,20.3,38.4]	[73.4,81.5,69.1]	Tenm2	n/a	Tenm2
10	40271922	40271951	8	7	-25.1	[19.2,30.4,29.0]	[0.6,0.0,2.5]	Hint1	n/a	Hint1
10	45545289	45545547	6	2	17.8	[48.3,44.4,35.0]	[54.8,61.6,62.1]	n/a	Arf1-13198,6572-Wnt3a	Arf1
10	55714200	55714272	5	2	-41.6	[25.9,60.9,40.8]	[5.4,0.0,29.2]	Arhgef15	n/a	Arhgef15
10	57112714	57112782	5	3	-40.9	[40.0,57.7,53.7]	[23.5,7.6,11.0]	n/a	Alox12-19840,47137-Alox12e	n/a
10	67191436	67191780	9	3	25.2	[76.8,51.7,59.7]	[84.8,95.6,73.5]	n/a	Slc6a4-35545,3495-Blmh	n/a
10	77093819	77093868	5	5	71.5	[10.8,16.7,10.3]	[93.9,78.0,75.9]	n/a	Tubd1-378685,168730-Akap1	n/a
10	105396059	105396099	9	6	-17.2	[20.3,23.8,11.2]	[0.8,0.7,1.8]	Ush1g	n/a	Ush1g
10	108269686	108269764	21	15	28.8	[22.0,19.5,16.4]	[45.0,56.0,22.0]	Usp36	n/a	Usp36
11	17146066	17146106	9	8	-30.2	[42.6,53.0,59.0]	[35.0,7.4,24.7]	n/a	Mir125b-2-702313,47398-Cxadr	n/a
11	31743497	31743549	5	4	29.8	[47.7,46.7,27.5]	[68.7,71.7,61.4]	Itsn1	n/a	Itsn1
11	63855759	63855814	5	3	36.8	[5.7,0.0,6.9]	[58.1,38.7,21.5]	Arhgap31	n/a	Arhgap31
11	69580699	69580855	9	9	52.6	[0.3,0.0,0.2]	[49.0,47.6,62.3]	Iqcg	n/a	Iqcg
12	10060115	10060156	5	3	-28.2	[85.4,100.0,98.8]	[78.5,62.5,75.0]	Trrap	n/a	Trrap
12	16089265	16089348	5	4	40.2	[0.0,18.6,8.5]	[58.6,49.8,27.5]	Prkar1b	n/a	Prkar1b
12	22788417	22788467	5	4	-36.6	[69.9,82.4,88.6]	[23.2,53.3,49.0]	n/a	Abhd11-8358,27666-Cldn4	Abhd11
12	23585373	23585418	9	7	-38.4	[21.9,31.2,51.2]	[0.0,12.7,2.4]	Ncf1	n/a	Ncf1
12	23791973	23792113	6	4	39.2	[34.8,33.1,22.7]	[72.8,64.4,55.7]	n/a	Gatsl2-18101,1077192-Mir6322	n/a
12	33719678	33719732	5	3	56.4	[25.8,0.0,2.2]	[56.0,81.4,15.4]	Hip1r	n/a	Hip1r
12	34621065	34621083	5	4	-37.7	[39.4,55.7,65.6]	[12.8,3.7,28.8]	n/a	Tmem120b-3036,10164-Orai1	Tmem120b
12	39062421	39062490	5	5	72.5	[18.7,0.0,16.7]	[88.3,92.6,69.1]	n/a	Tbx3-895751,378817-RGD1562310	n/a
12	43111111	43111179	5	4	26.8	[20.4,0.0,14.7]	[36.2,47.3,24.7]	Ankrd13a	n/a	Ankrd13a
13	40660450	40660482	5	4	37.9	[2.8,0.0,25.8]	[59.9,40.8,47.8]	n/a	Acmsd-86750,45225-Mir3473	n/a
13	44269540	44269643	5	2	28.6	[35.2,51.5,39.0]	[61.8,68.5,90.7]	Srgap2	n/a	Srgap2
13	48819200	48819299	31	22	29.8	[47.6,31.8,37.7]	[66.8,66.6,74.6]	n/a	Phlda3-25201,11142-Tnni1	Tnni1
13	51913209	51913262	5	3	42.7	[36.7,41.6,45.9]	[81.8,93.5,66.4]	n/a	Nek7-161177,230229-Lhx9	n/a
13	69053464	69053587	6	3	-34.2	[53.3,79.4,55.3]	[18.2,39.0,43.0]	n/a	Rgsl2h-144775,313666-Cacna1e	n/a
13	94586882	94586912	6	6	-44.2	[43.8,66.5,57.3]	[0.8,0.0,31.1]	Kif26b	n/a	Kif26b
13	95168374	95168497	6	3	-28.2	[69.9,87.0,88.6]	[38.0,69.3,90.2]	Smyd3	n/a	Smyd3
13	106031408	106031457	5	3	30.1	[62.6,54.4,56.6]	[86.0,90.1,79.5]	Ptpn14	n/a	Ptpn14
14	2958537	2958713	5	2	11.8	[65.0,71.0,79.5]	[76.4,82.7,88.2]	n/a	Ephx4-25717,24047-Brdt	n/a
14	4804119	4804353	6	3	-38.3	[66.5,65.2,100.0]	[45.7,36.6,66.0]	n/a	Barhl2-911076,300524-Lrrc8d	n/a
14	9078808	9078864	6	2	-27.8	[85.5,84.0,82.3]	[73.8,48.3,62.3]	Cds1	n/a	Cds1
14	11126297	11126452	8	6	42.1	[4.9,1.0,0.0]	[40.8,52.8,34.3]	n/a	Hnrnpd-190311,761648-Prkg2	n/a
14	49295945	49296146	5	3	10.6	[58.6,65.0,64.4]	[72.2,78.5,67.0]	n/a	Wdr82-748001,1313154-Arap2	n/a
14	78263930	78263981	5	4	30.9	[19.5,0.4,5.2]	[34.2,42.8,36.2]	n/a	Msx1-2786,85896-Cytl1	n/a
14	83328062	83328105	7	4	37.4	[20.5,0.0,0.5]	[53.0,15.8,43.5]	Slc5a1	n/a	Slc5a1
14	86532721	86532789	5	2	10.5	[68.3,82.9,61.1]	[77.4,73.9,86.8]	Aebp1	n/a	Aebp1
14	86683252	86683607	9	5	19.3	[30.6,45.5,42.7]	[55.3,66.8,52.2]	Camk2b	n/a	Camk2b
14	92399606	92399670	6	3	-35.1	[74.2,86.6,81.8]	[50.5,40.8,61.1]	n/a	RGD1309870-16164,160529-Ikzf1	n/a
14	103656026	103656093	6	4	-40.4	[51.5,52.6,36.1]	[1.2,12.8,19.9]	Commd1	n/a	Commd1
15	18685274	18685409	7	3	27.3	[11.4,1.1,1.1]	[24.4,31.2,36.5]	n/a	Kctd6-880,27381-LOC498460	Kctd6
15	47353634	47353650	5	5	35.4	[2.1,0.0,9.7]	[0.0,46.2,29.1]	n/a	Gnrh1-46117,282652-Nefl	n/a
15	56622270	56622384	5	2	27.4	[61.6,65.9,59.5]	[94.1,93.0,68.9]	Cog3	n/a	Cog3
15	57197525	57197705	5	3	46.7	[54.2,35.4,46.4]	[88.2,99.0,84.5]	n/a	Nufip1-138691,207223-Tsc22d1	n/a
15	71038760	71038830	7	4	-31.3	[44.9,35.5,53.4]	[23.6,10.4,12.5]	n/a	Pcdh20-271940,4788349-Pcdh9	n/a
15	89916679	89916730	5	3	38.2	[37.0,41.4,24.7]	[67.2,77.0,73.0]	n/a	Ndfip2-541134,92374-Spry2	n/a
15	105901274	105901326	5	4	32.6	[15.2,0.0,1.8]	[39.9,47.2,33.7]	n/a	Rap2a-330690,279148-Farp1	n/a
16	874927	874996	5	3	14.8	[9.0,10.3,12.1]	[28.8,27.4,8.8]	n/a	Rps24-826574,162885-Zmiz1	n/a
16	2611707	2611912	6	5	-19.8	[92.7,96.1,88.8]	[64.4,77.4,56.4]	Arhgef3	n/a	Arhgef3
16	9778982	9779163	6	2	-19.5	[83.9,100.0,87.1]	[73.8,71.4,64.3]	n/a	Anxa8-48403,8006-Npy4r	n/a
16	18886302	18886380	8	5	-20.4	[29.7,22.0,20.0]	[2.1,0.9,2.9]	Jak3	n/a	Jak3
16	36318586	36318678	5	4	-34.3	[42.9,58.3,41.0]	[18.3,7.9,25.0]	n/a	Scrg1-107606,5648-Hand2	n/a
16	60564878	60564937	7	4	-19.4	[6.2,24.1,20.4]	[0.3,0.0,3.2]	n/a	Ppp1r3b-89,389498-Tnks	Ppp1r3b
16	76246820	76247048	6	3	33.4	[7.0,21.7,10.3]	[44.5,51.3,31.6]	n/a	Angpt2-304565,1238169-Csmd1	n/a
16	76945869	76945907	6	6	-48.5	[51.5,71.3,57.0]	[22.2,4.6,13.6]	n/a	Angpt2-1003614,539310-Csmd1	n/a
16	78707244	78707433	6	3	23.1	[53.8,46.1,50.0]	[68.0,79.0,71.3]	n/a	Csmd1-102205,622961-Myom2	n/a
16	83012122	83012301	7	2	17.4	[20.7,6.1,16.6]	[30.8,33.4,33.6]	n/a	Rab20-116976,32881-Col4a1	n/a
17	4281441	4281478	8	8	33.7	[0.0,1.7,18.9]	[37.1,54.2,1.8]	n/a	Papd7-322456,262011-Adcy2	n/a
17	8854702	8854734	5	5	15.9	[0.0,0.3,0.0]	[19.0,17.2,13.2]	n/a	Fbp2-1013043,76733-Ctsm	n/a
17	15935669	15935742	5	4	32.7	[41.7,39.7,57.0]	[83.1,86.7,76.6]	n/a	Sncb-19964,51472-Rnf44	n/a
17	22396243	22396561	7	2	19.6	[75.1,78.7,69.8]	[95.6,92.0,88.4]	n/a	Mir3596b-274254,128730-Id4	n/a
17	22609252	22609299	5	4	-56.5	[57.5,100.0,81.5]	[28.7,25.7,53.3]	n/a	Id4-81391,874322-Rnf144b	n/a
17	26064417	26064604	5	3	26.5	[15.5,41.6,35.6]	[76.1,50.1,63.8]	n/a	Mylip-734530,641041-Cd83	n/a
17	73067990	73068071	6	2	-19.7	[90.8,93.4,79.5]	[67.1,64.8,83.2]	Adarb2	n/a	Adarb2
17	81114169	81114311	7	3	15.2	[74.3,81.9,73.5]	[90.6,89.5,92.3]	n/a	Gata3-1102595,1594042-Celf2	n/a
17	93284212	93284310	8	4	43.1	[15.7,0.0,12.6]	[65.1,61.3,34.0]	Armc3	n/a	Armc3
18	2156838	2156872	6	6	48.9	[38.1,0.0,17.8]	[78.7,63.2,17.2]	Mib1	n/a	Mib1
18	23768658	23768682	9	9	22.3	[0.4,0.0,12.9]	[19.1,32.5,18.6]	n/a	Rit2-85731,36397-Syt4	n/a
18	24357111	24357179	10	8	-11.6	[12.2,12.5,8.2]	[1.0,0.0,0.0]	Lims2	n/a	Lims2
18	31022806	31022976	5	2	-29.9	[74.1,96.6,78.3]	[48.3,59.0,53.7]	n/a	Fchsd1-132131,155815-RGD735029	n/a
18	31178559	31178577	5	2	-17.2	[30.3,26.2,42.1]	[13.2,8.3,17.7]	n/a	Fchsd1-287884,214-RGD735029	RGD735029
18	49143687	49143733	7	5	-33	[35.0,0.0,43.6]	[4.2,0.3,0.8]	n/a	Ppic-244533,48698-Cep120	n/a
18	54715910	54716038	5	4	58.5	[24.9,38.7,15.2]	[86.9,95.8,69.3]	Adamts19	n/a	Adamts19
18	63553630	63553823	9	3	-15.1	[81.2,76.0,77.9]	[58.3,68.6,62.7]	n/a	Mc4r-160821,41778-Gnal	n/a
19	14099548	14099609	5	3	-22.4	[90.7,100.0,96.9]	[79.2,73.1,73.2]	Rasd2	n/a	Rasd2
19	22720661	22720747	6	2	24.3	[64.5,74.8,56.6]	[80.2,94.9,95.6]	n/a	Itfg1-37780,10085-Neto2	Neto2
19	22849465	22849522	6	3	-39	[96.9,100.0,87.5]	[72.4,44.5,76.0]	n/a	Neto2-82369,4179-Dnaja2	Dnaja2
19	25001054	25001122	6	5	37.6	[42.5,17.8,50.4]	[94.7,69.5,69.1]	n/a	Gadd45gip1-21644,17229-Nfix	n/a
19	25712441	25712473	5	5	-37.6	[29.7,48.8,39.1]	[0.0,0.5,3.5]	n/a	Cc2d1a-1658,25479-Dcaf15	n/a
19	38713521	38713538	5	2	46.9	[33.3,10.9,38.1]	[69.2,82.5,59.3]	n/a	Psmd7-1254081,648977-Pmfbp1	n/a
19	38980387	38980420	5	4	-23.1	[70.0,80.0,88.4]	[65.3,59.7,53.8]	n/a	Psmd7-1520947,382095-Pmfbp1	n/a
19	52002579	52002798	8	2	25.1	[69.0,76.9,60.7]	[97.4,91.4,85.7]	Jph3	n/a	Jph3
19	52899132	52899183	5	2	33.3	[57.8,64.3,50.4]	[95.1,86.3,81.6]	Pabpn1l	n/a	Pabpn1l
2	12283994	12284047	5	3	27.9	[2.0,0.0,0.0]	[39.0,28.4,13.5]	n/a	Mir9-2-24402,1895846-Ccnh	n/a
2	29168336	29168379	9	4	21.2	[2.1,0.0,0.3]	[0.0,28.2,17.5]	n/a	Foxd1-222211,89447-Tmem174	n/a
2	31424242	31424271	6	2	17.9	[0.0,0.0,3.1]	[20.7,11.4,17.6]	Marveld2	n/a	Marveld2
2	121891228	121891476	6	3	-40.8	[64.5,75.1,67.4]	[25.9,37.5,22.6]	n/a	Sox2-919798,448076-Dcun1d1	n/a
2	181597557	181597692	5	4	-58.8	[76.3,95.5,90.2]	[35.2,13.6,27.7]	n/a	Zbtb7b-19401,375-Flad1	n/a
2	221045909	221045998	5	3	21.1	[73.8,73.9,78.5]	[98.5,97.0,88.4]	n/a	Ndst3-618218,47370-Tram1l1	n/a
2	235588411	235588653	7	4	-43.3	[56.8,93.1,72.8]	[42.6,21.7,41.8]	n/a	Dapp1-114343,25056-Mttp	n/a
2	242429702	242430218	5	2	-23.4	[73.1,81.0,86.4]	[54.7,52.9,68.3]	n/a	Pkn2-1420639,67855-Lmo4	n/a
2	244585404	244585449	6	3	59.7	[45.9,82.4,17.9]	[97.0,100.0,63.0]	n/a	Lpar3-74589,18910-Ssx2ip	n/a
20	8714262	8714300	5	5	23.6	[0.0,0.9,1.2]	[34.1,18.6,18.2]	Btbd9	n/a	Btbd9
20	10508413	10508515	6	2	-20.5	[91.5,95.2,93.4]	[68.8,75.3,71.4]	n/a	Hsf2bp-56147,33140-Pdxk	n/a
20	12719388	12719472	10	10	-57.3	[63.1,11.1,72.6]	[7.9,5.0,3.4]	Dip2a	n/a	Dip2a
20	14232267	14232470	7	4	22.5	[31.2,20.1,50.0]	[69.0,58.6,49.6]	n/a	Gnaz-58131,275333-Pcdh15	n/a
20	21840729	21840811	17	14	31.1	[58.3,61.6,41.0]	[63.0,89.3,89.8]	n/a	Zfp365-325884,36634-Ado	n/a
20	43959021	43959029	5	5	16.7	[64.1,66.3,71.0]	[83.9,83.0,82.8]	Rev3l	n/a	Rev3l
20	45220690	45220716	5	5	47.9	[15.3,0.0,17.7]	[52.1,69.9,61.1]	Fig4	n/a	Fig4
3	512284	513118	6	2	12.5	[69.3,62.3,72.3]	[83.5,80.7,79.5]	n/a	Chr_Start-752773-LOC499742	n/a
3	857533	857571	6	3	-21.5	[90.4,83.3,85.7]	[67.5,62.8,75.9]	n/a	Chr_Start-408320-LOC499742	n/a
3	6093327	6093452	5	3	-42.9	[45.2,72.0,62.0]	[21.7,5.1,25.6]	Sardh	n/a	Sardh
3	8484968	8485016	6	5	-37.6	[34.0,60.6,48.2]	[29.1,0.0,19.2]	n/a	Med27-1713,284151-Trub2	n/a
3	23226986	23227030	11	9	37.4	[57.1,45.9,33.6]	[77.7,87.2,56.4]	n/a	Lrp1b-308377,819211-Kynu	n/a
3	52516532	52516792	5	2	17.1	[85.2,85.3,79.2]	[100.0,99.6,100.0]	Myo3b	n/a	Myo3b
3	90642611	90642715	5	2	-45.6	[66.2,100.0,98.9]	[47.1,12.3,76.1]	LOC691083	n/a	LOC691083
3	114681988	114682283	6	2	-22.4	[59.3,44.0,64.4]	[50.2,30.2,34.3]	n/a	Blvra-36984,2238-Itpripl1	n/a
3	142445820	142445854	6	4	36.8	[14.8,8.2,4.1]	[38.1,61.0,32.0]	Scrt2	n/a	Scrt2
3	142623641	142623664	6	6	13.5	[0.0,0.0,0.0]	[16.1,14.1,0.0]	n/a	Csnk2a1-14336,48-Tbc1d20	Tbc1d20
3	145186118	145186253	5	3	47.6	[18.4,20.9,21.5]	[58.9,86.5,53.8]	n/a	Pxmp4-107748,89578-Raly	n/a
3	147228964	147229028	5	2	32.2	[73.2,61.3,61.3]	[97.1,94.2,94.1]	n/a	Myl9-35099,10094-Tgif2	Tgif2
3	147652273	147652381	5	4	55.5	[47.7,0.0,23.6]	[72.5,86.9,84.7]	n/a	Dsn1-65305,36665-Samhd1	n/a
3	163145309	163145362	5	4	42.2	[39.5,28.1,47.5]	[97.0,83.5,75.8]	n/a	Cbln4-223667,13413-Mc3r	Mc3r
3	163998942	163999150	5	3	-48.2	[81.0,89.2,65.8]	[27.5,27.0,38.9]	n/a	Rbm38-100628,13259-Pck1	Pck1
3	169107440	169107470	6	5	-18.6	[17.7,23.2,0.0]	[0.2,2.0,0.9]	n/a	Psma7-291,48-Ss18l1	Ss18l1
4	18887802	18887867	5	3	-36.5	[93.3,82.7,91.5]	[54.9,45.0,84.6]	n/a	Sema3d-55463,1857556-Grm3	n/a
4	30043178	30043287	6	3	-10	[96.0,98.4,93.1]	[85.5,86.4,86.0]	Pon2	n/a	Pon2
4	64617299	64617342	5	3	51.3	[71.6,28.5,46.7]	[90.8,100.0,80.6]	Dgki	n/a	Dgki
4	64694008	64694079	5	3	35.6	[0.6,0.0,0.0]	[34.3,42.9,19.2]	n/a	Dgki-30381,9378-Creb3l2	n/a
4	79078961	79078979	5	5	-36.5	[83.3,100.0,72.7]	[35.9,53.8,57.1]	n/a	Npvf-188724,589089-Nfe2l3	n/a
4	83224864	83224882	6	2	-23.3	[16.6,45.8,35.5]	[15.4,5.1,26.5]	n/a	n/a	n/a
4	116220692	116221039	6	3	23.9	[58.8,65.2,88.5]	[86.1,91.9,96.3]	n/a	Mrpl19-8921,59840-Eva1a	Mrpl19
4	117883970	117884074	5	2	-27.7	[79.1,83.6,91.4]	[72.4,49.5,66.1]	n/a	Clec4f-34386,19673-Vax2	n/a
4	125493483	125493628	7	5	35.4	[65.2,52.4,57.8]	[97.3,98.6,65.0]	n/a	Hdac11-150079,46616-Wnt7a	n/a
4	135068059	135068209	6	3	25.6	[13.8,0.6,12.2]	[44.5,34.2,23.1]	n/a	Prok2-493572,33490-Rybp	n/a
4	135419854	135420078	5	4	29.5	[28.6,26.4,4.8]	[66.9,32.8,46.5]	n/a	Rybp-266427,58123-Shq1	n/a
4	152175717	152175986	5	2	37.3	[49.6,53.9,38.5]	[82.0,92.9,70.9]	n/a	Plxnd1-55775,167643-Fam21c	n/a
4	155004956	155005063	5	2	27.9	[28.9,0.0,11.6]	[40.5,33.3,55.8]	Cacna1c	n/a	Cacna1c
4	156652330	156652470	5	4	31.8	[70.2,40.5,50.4]	[82.7,80.8,89.0]	B4galnt3	n/a	B4galnt3
4	173782222	173782340	9	9	86.6	[2.2,2.9,0.0]	[93.6,88.5,80.6]	Gucy2c	n/a	Gucy2c
4	180853644	180853654	6	2	-20.1	[23.8,21.8,22.8]	[5.2,0.0,2.6]	Sox5	St8sia1-756,49698-C2cd5	St8sia1
4	183227074	183227255	5	2	29.4	[54.7,48.2,43.5]	[83.5,73.9,79.0]	n/a	Lmntd1-149413,61874-Tuba3b	n/a
5	23291095	23291135	11	9	26.5	[77.6,68.4,57.4]	[96.4,83.8,96.2]	Clvs1	n/a	Clvs1
5	36423056	36423067	5	4	24.5	[0.0,2.0,0.3]	[22.8,30.5,17.2]	n/a	Nkain3-945760,42422-Ccnc	n/a
5	47480035	47480257	7	3	-20.7	[21.0,25.0,25.6]	[4.4,3.2,2.4]	n/a	Epha7-2601703,772370-Map3k7	n/a
5	74610996	74611190	5	2	-17.4	[15.3,20.2,24.5]	[2.3,1.2,14.2]	n/a	Klf4-1159710,35332-Actl7b	n/a
5	122024952	122025056	6	2	-35.3	[74.2,55.1,73.9]	[20.9,18.7,40.3]	n/a	Mir101a-34293,37815-Ak4	n/a
5	122084769	122084813	6	4	56	[16.7,0.0,21.0]	[68.0,80.1,63.4]	Ak4	n/a	Ak4
5	135420990	135421016	7	6	-35.1	[56.7,67.3,62.2]	[22.5,18.8,40.3]	n/a	Cmpk1-72017,10402-Tal1	Tal1
5	136132686	136132721	5	4	-56.8	[57.4,87.2,74.1]	[47.1,7.9,3.2]	Mknk1	n/a	Mknk1
5	136160604	136160687	7	3	19.8	[3.1,0.0,1.2]	[19.5,23.6,20.3]	n/a	Mknk1-19263,16637-Dmbx1	n/a
5	149435589	149435615	5	4	-52.3	[78.9,90.2,100.0]	[40.0,45.7,28.9]	n/a	Snrnp40-12616,50412-Sdc3	n/a
6	12391051	12391125	15	12	24.9	[39.3,44.6,44.7]	[71.5,59.8,77.5]	Ppp1r21	n/a	Ppp1r21
6	55087640	55087713	5	3	-37.4	[48.0,46.8,47.4]	[0.5,10.1,28.3]	n/a	Sostdc1-17189,51441-Ispd	n/a
6	73701796	73701933	5	2	40.6	[57.0,45.5,42.7]	[84.3,93.3,79.7]	n/a	Akap6-347276,749104-Egln3	n/a
6	96289551	96289692	6	3	60.8	[47.2,12.2,33.1]	[90.3,90.9,68.4]	n/a	Prkch-7763,129331-Hif1a	n/a
6	107440678	107440705	6	3	-13.3	[10.1,16.0,19.1]	[0.3,6.0,0.5]	Dpf3	n/a	Dpf3
6	122268714	122268843	8	5	28.1	[10.0,6.4,1.7]	[47.7,31.6,27.2]	n/a	Flrt2-2609765,86815-Galc	n/a
6	128589455	128589471	5	5	11.9	[77.3,75.0,79.6]	[89.7,92.0,83.9]	n/a	Gsc-60771,270470-Clmn	n/a
6	132317229	132317284	6	4	44.7	[15.8,32.0,16.6]	[59.8,73.3,30.8]	Bcl11b	n/a	Bcl11b
6	137232424	137232529	7	4	29.7	[30.5,45.0,45.0]	[65.4,74.7,66.2]	n/a	Kif26a-225256,107128-Tmem179	n/a
7	5989545	5989557	5	2	21.1	[72.8,60.0,75.0]	[94.0,96.8,90.4]	n/a	Olr987-10805,61133-Olr990	Olr987
7	12927921	12927963	5	3	-45.3	[86.0,80.0,87.2]	[23.4,42.7,73.4]	Wiz	n/a	Wiz
7	16313904	16313927	5	3	28.7	[2.0,0.4,3.4]	[37.7,24.5,22.1]	Kank3	n/a	Kank3
7	20973985	20974033	6	4	42	[25.0,9.1,26.2]	[52.0,79.9,68.8]	n/a	Ric8b-8932,193340-Polr3b	Ric8b
7	21538395	21538476	7	3	33.7	[10.9,0.0,2.2]	[24.0,54.4,42.1]	n/a	Nuak1-9327,617076-LOC100910996	n/a
7	32468442	32468577	5	2	38.7	[27.5,17.2,0.7]	[39.6,72.5,64.9]	n/a	Cep83-484048,35701-Cradd	n/a
7	48108685	48110000	8	3	-14.8	[96.9,90.4,81.9]	[72.7,81.6,64.3]	n/a	Syt1-313189,395501-Nav3	n/a
7	58578533	58578764	5	3	26.6	[68.5,41.5,55.4]	[82.6,89.5,82.3]	n/a	Cand1-79441,571351-Grip1	n/a
7	71564289	71564366	6	3	45.6	[31.9,19.9,19.8]	[83.1,62.5,70.2]	n/a	Cox6c-85765,105962-Fbxo43	n/a
7	112895011	112895202	5	3	20.5	[59.0,56.8,40.1]	[73.9,60.2,66.7]	n/a	Ly6d-20512,82192-Cyp11b1	n/a
7	125015154	125015274	6	2	-38.5	[54.6,58.8,57.6]	[29.2,6.4,33.8]	n/a	Cerk-833084,820141-Fam19a5	n/a
7	126341158	126341239	5	3	-28.3	[30.8,34.1,31.9]	[8.7,0.9,5.2]	n/a	Fam19a5-284813,645771-Brd1	n/a
7	135265350	135265404	5	3	38.2	[33.3,19.1,4.3]	[61.8,50.8,54.1]	Slc38a1	n/a	Slc38a1
7	139805770	139805786	5	2	14.6	[3.8,5.4,1.4]	[10.6,21.9,8.0]	n/a	Scn8a-11480,67809-Acvrl1	n/a
7	142086661	142086804	5	4	60.8	[30.5,5.5,23.5]	[82.1,99.5,60.2]	n/a	Smug1-20111,21117-Cbx5	n/a
8	6090401	6090446	6	4	28.4	[45.3,67.3,57.6]	[89.0,83.3,83.9]	n/a	Pgr-244500,440437-Cntn5	n/a
8	12721284	12721410	9	7	50.1	[16.7,5.4,0.0]	[72.3,51.1,47.5]	Fat3	n/a	Fat3
8	41254229	41254287	6	3	30.8	[49.2,37.1,46.8]	[70.5,78.4,63.8]	n/a	Olr1275-34088,20833-Olr1278	n/a
8	51154948	51155149	5	2	-18.3	[50.3,55.6,52.3]	[15.2,50.8,34.1]	n/a	Cadm1-45986,552321-Nxpe1	n/a
8	53698160	53698290	5	2	38.9	[40.6,37.0,39.7]	[82.0,73.1,82.4]	n/a	Ncam1-577588,153812-Plet1	n/a
8	65166756	65166792	6	6	28.1	[71.2,63.6,72.9]	[98.8,99.6,97.4]	n/a	Uaca-47947,318965-Tle3	n/a
8	91817444	91817491	5	4	-69	[83.4,100.0,58.3]	[6.9,14.8,17.2]	Pgm3	n/a	Pgm3
8	104424662	104424727	9	4	-10.7	[34.9,32.0,25.3]	[21.4,18.6,18.7]	Armc8	n/a	Armc8
8	107270544	107270587	5	3	33.2	[16.4,0.0,0.0]	[47.5,43.9,7.9]	Ephb1	n/a	Ephb1
8	108640761	108640829	7	5	16.8	[65.7,72.2,72.5]	[93.2,85.7,84.8]	n/a	Bfsp2-118261,424570-Nphp3	n/a
8	125128537	125128625	5	4	-48.9	[85.0,84.5,94.8]	[55.1,28.6,55.4]	Mobp	n/a	Mobp
8	127158930	127158988	5	2	-25	[47.0,29.9,28.6]	[0.0,15.2,10.0]	Klhl40	n/a	Klhl40
9	9045295	9045389	6	3	-29	[61.6,67.1,58.9]	[26.1,48.7,38.4]	n/a	Taf8-81280,1227-Guca1a	Guca1a
9	10483790	10483920	6	2	18.8	[70.2,54.4,61.1]	[83.5,79.7,77.6]	n/a	Mrps18a-48220,36809-Vegfa	n/a
9	11436153	11436327	6	3	-44	[82.9,85.7,88.1]	[52.0,32.5,45.3]	n/a	Cdc5l-232018,277333-Znrd1-as1	n/a
9	18057850	18057912	5	3	22.6	[3.2,0.0,0.0]	[29.1,19.5,5.1]	Tfap2b	n/a	Tfap2b
9	31431836	31431978	6	2	24.2	[40.7,24.7,33.2]	[50.8,62.6,48.1]	n/a	Khdrbs2-27763,774295-Prim2	n/a
9	32492545	32492748	6	2	-21.8	[70.5,76.3,94.4]	[48.0,62.6,74.6]	Bag2	n/a	Bag2
9	74595534	74595562	5	3	-14.3	[0.0,14.0,18.4]	[0.4,0.0,1.6]	n/a	Dnpep-120,42228-Des	Dnpep
9	77468091	77468349	5	2	10	[76.3,88.7,71.8]	[91.7,89.5,89.1]	n/a	Epha4-647339,9463-Pax3	n/a
9	77904490	77904556	5	3	27.4	[59.1,49.9,49.1]	[65.4,88.1,78.4]	Mogat1	n/a	Mogat1
9	91559815	91560325	5	3	36.2	[53.0,42.4,32.8]	[77.1,75.9,72.7]	n/a	Hdac4-170005,94809-Ndufa10	n/a
9	107124722	107125470	5	2	-21.2	[88.5,76.7,87.2]	[64.8,55.7,71.8]	Arhgap28	n/a	Arhgap28
X	90842868	90842894	6	6	31.4	[33.2,21.1,40.5]	[50.0,71.2,65.4]	n/a	Dmrtc1c1-44022,284943-Nap1l2	n/a
X	90843046	90843140	12	9	32.4	[33.3,20.3,23.1]	[76.3,48.5,51.2]	n/a	Dmrtc1c1-44200,284697-Nap1l2	n/a
X	122513987	122514019	6	3	28.8	[69.0,57.4,70.0]	[96.6,96.1,94.0]	n/a	Armcx2-247517,113180-Pramel	n/a
X	130298607	130299446	7	2	10.8	[59.1,61.6,52.3]	[61.9,72.9,65.0]	n/a	Psmd10-1507709,2409869-Actrt1	n/a
X	160446080	160446146	5	5	-55.2	[59.0,97.1,93.8]	[31.4,34.9,28.1]	n/a	Ikbkg-25890,23098-Olr1768	n/a
X	160539343	160539409	6	3	-38.2	[78.5,100.0,74.9]	[64.9,30.9,65.2]	n/a	Olr1768-69160-End_Chr	n/a
